# Supplementary material for: The metabolic response of thecosome pteropods from the North Atlantic and North Pacific oceans to high CO 2 and low O 2
Source: Copernicus journal article supplement (doi:10.5194/bg-13-6191-2016), 2016-11-17
Supplement: Supplementary file 1 [file bg-13-6191-2016-supplement.zip]

Archive with 3 entries (3 files):
- Supplementary_Atlantic_carbonate_chemistry.txt
- Supplementary_Pacific_carbonate_chemistry.txt
- bg-13-6191-2016-supplement-title-page.pdf
