# Supplementary material for: The metabolic response of thecosome pteropods from the North Atlantic and North Pacific oceans to high CO 2 and low O 2
Source: Copernicus journal article supplement (doi:10.5194/bg-13-6191-2016), 2016-11-17
Supplement: Supplementary file 1 [file bg-13-6191-2016-supplement.zip › bg-13-6191-2016-supplement-title-page.pdf]

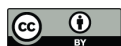

*Supplement of*

**The metabolic response of thecosome pteropods from the North Atlantic and North Pacific oceans to high CO<sub>2</sub> and low O<sub>2</sub>**

**Amy E. Maas et al.**

*Correspondence to:* Amy E. Maas ([amy.maas@bios.edu](mailto:amy.maas@bios.edu))

- [bg-13-6191-2016-supplement-title-page.pdf](#)
- [Supplementary\\_Atlantic\\_carbonate\\_chemistry.txt](#)
- [Supplementary\\_Pacific\\_carbonate\\_chemistry.txt](#)

The copyright of individual parts of the supplement might differ from the CC-BY 3.0 licence.
